# Supplementary material
Source: PubMed Central journal article supplement (PMC2818052)
Supplement: NIHMS132422-supplement-Supp_Info.pdf [file NIHMS132422-supplement-Supp_Info.pdf]

## Supplementary Information

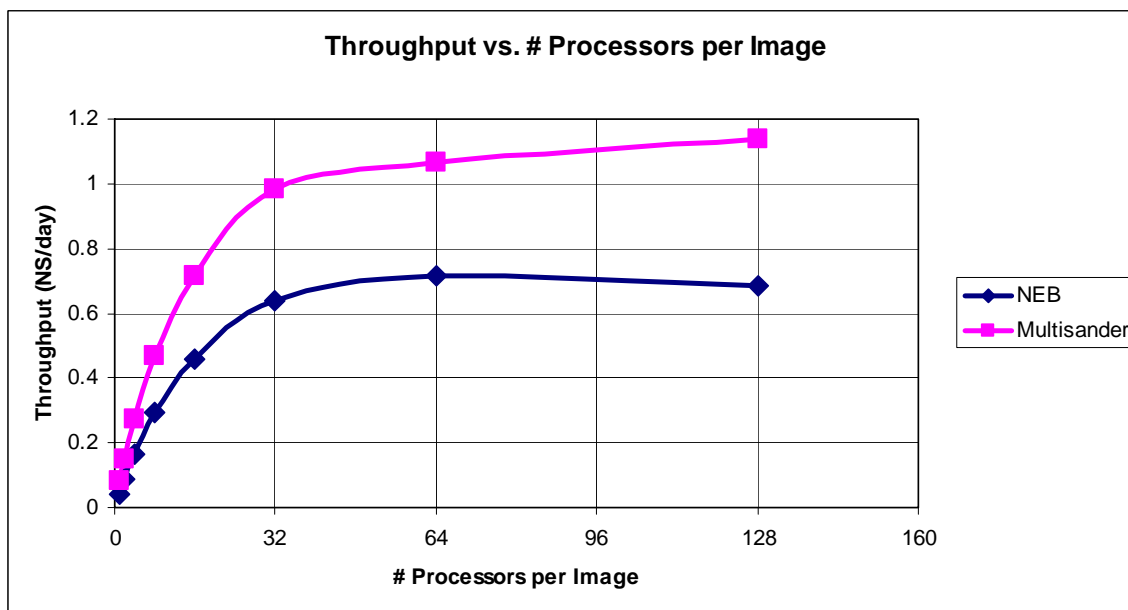

Figure 1S Throughput vs. Processors per image for PNEB vs. Multisander

Table 1S Benchmark Data for NEB vs. Multisander, Amber 11. 60,000 atom system, 1000 steps MD, dt=0.001, 30 images total

| NEB | # Processors per image | Time (seconds) | Speedup (vs. 1 proc) | Efficiency (speedup/# proc) | % efficiency | Steps/Sec | NS/sec   | NS/day |
|-----|------------------------|----------------|----------------------|-----------------------------|--------------|-----------|----------|--------|
|     | 1                      | 2137           | 1.00                 | 1.00                        | 100.00       | 0.47      | 4.68E-07 | 0.04   |
|     | 2                      | 982            | 2.18                 | 1.09                        | 108.81       | 1.02      | 1.02E-06 | 0.09   |
|     | 4                      | 530            | 4.03                 | 1.01                        | 100.80       | 1.89      | 1.89E-06 | 0.16   |
|     | 8                      | 295            | 7.24                 | 0.91                        | 90.55        | 3.39      | 3.39E-06 | 0.29   |
|     | 16                     | 188            | 11.37                | 0.71                        | 71.04        | 5.32      | 5.32E-06 | 0.46   |
|     | 32                     | 135            | 15.83                | 0.49                        | 49.47        | 7.41      | 7.41E-06 | 0.64   |
|     | 64                     | 121            | 17.66                | 0.28                        | 27.60        | 8.26      | 8.26E-06 | 0.71   |
|     | 128                    | 126            | 16.96                | 0.13                        | 13.25        | 7.94      | 7.94E-06 | 0.69   |

  

| Multisander | # Processors per image | Time (seconds) | Speedup (vs. 1 proc) | Efficiency (speedup/# proc) | % efficiency | Steps/Sec | NS/sec   | NS/day |
|-------------|------------------------|----------------|----------------------|-----------------------------|--------------|-----------|----------|--------|
|             | 1                      | 1058           | 1.00                 | 1.00                        | 100.00       | 0.95      | 9.45E-07 | 0.08   |
|             | 2                      | 582            | 1.82                 | 0.91                        | 90.89        | 1.72      | 1.72E-06 | 0.15   |
|             | 4                      | 316            | 3.35                 | 0.84                        | 83.70        | 3.16      | 3.16E-06 | 0.27   |
|             | 8                      | 184            | 5.75                 | 0.72                        | 71.88        | 5.43      | 5.43E-06 | 0.47   |
|             | 16                     | 121            | 8.74                 | 0.55                        | 54.65        | 8.26      | 8.26E-06 | 0.71   |
|             | 32                     | 88             | 12.02                | 0.38                        | 37.57        | 11.36     | 1.14E-05 | 0.98   |
|             | 64                     | 81             | 13.06                | 0.20                        | 20.41        | 12.35     | 1.23E-05 | 1.07   |
|             | 128                    | 76             | 13.92                | 0.11                        | 10.88        | 13.16     | 1.32E-05 | 1.14   |

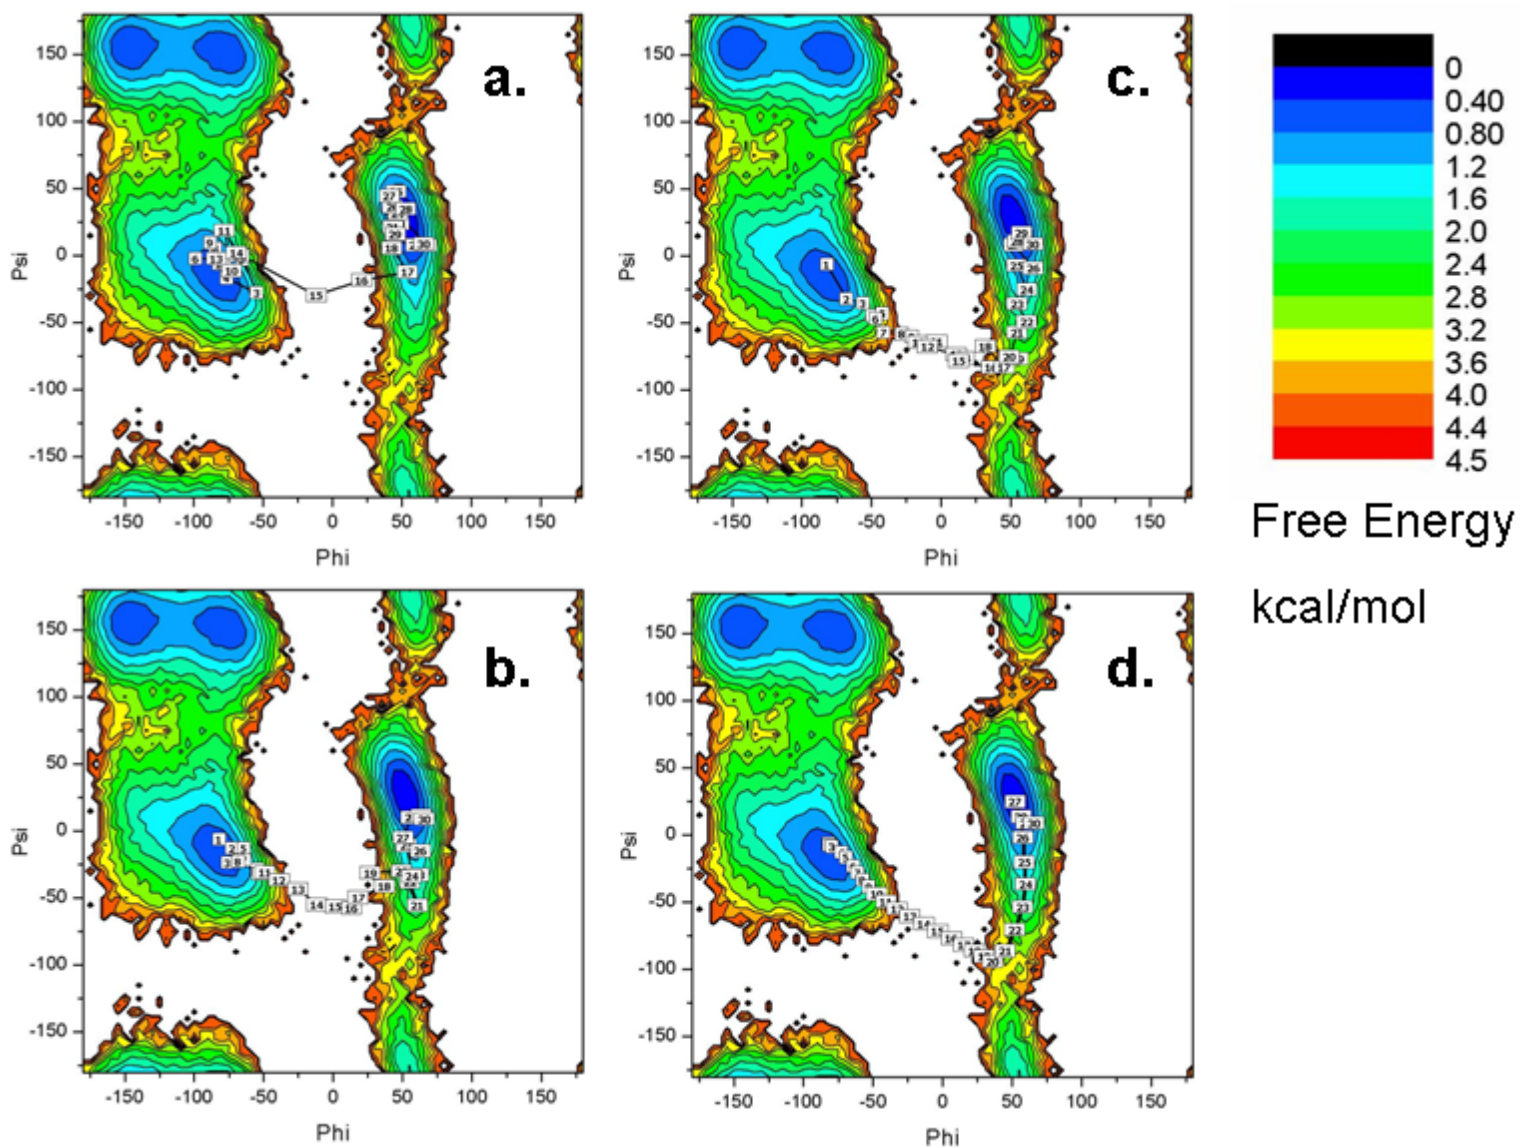

Figure 2S Structure distribution along path at different levels of optimization in PNEB simulated annealing protocol. a) Initial interpolating path between left handed helix and right handed helix minima, b) After equilibration of initial path, c) Images after simulated annealing step, d) Images in final path distribution.

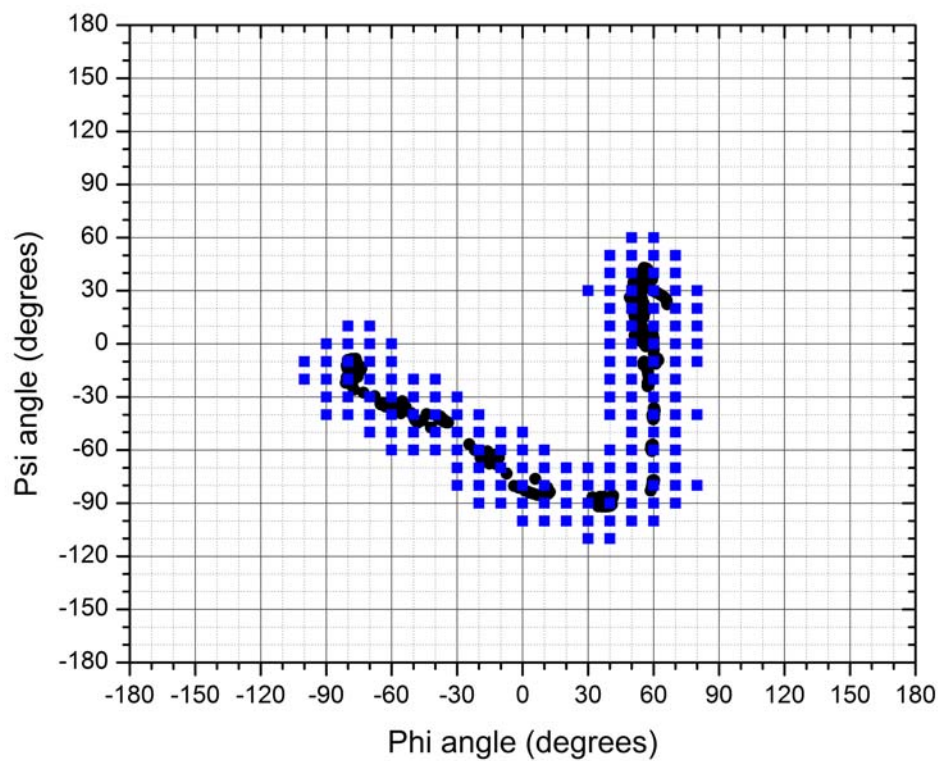

**Figure 3S Initial distribution (shown in blue squares) of umbrella sampling starting structures from PNEB path (shown in black dots).**

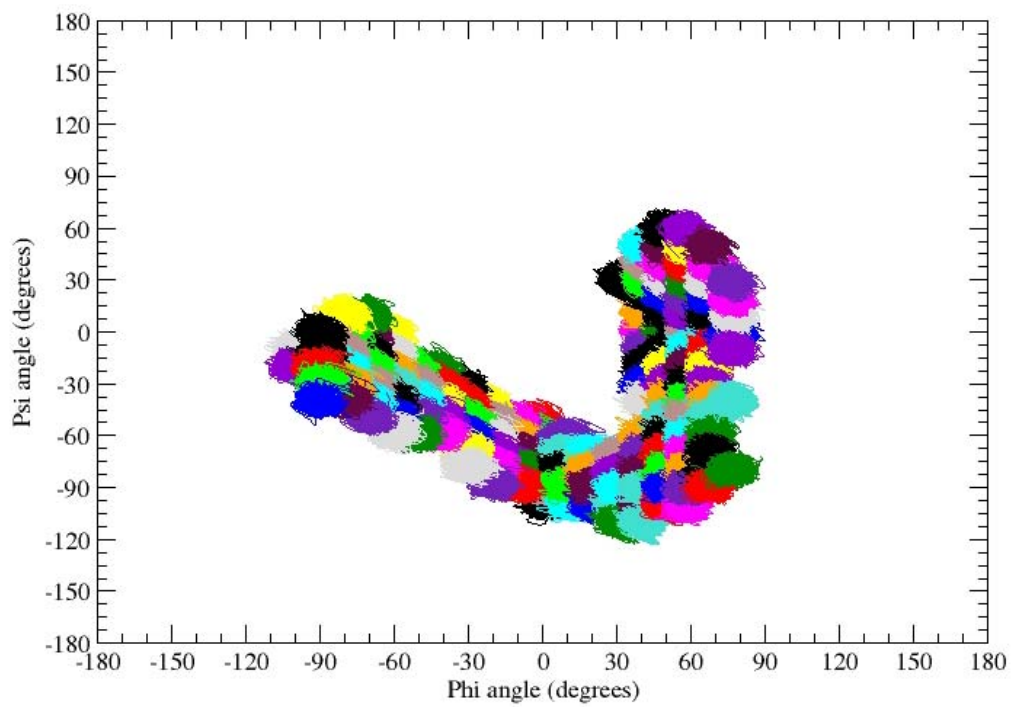

**Figure 4S** Population distribution of each umbrella sampling window run for 2D WHAM analysis.
